# Supplementary material
Source: PubMed Central journal article supplement (PMC7161033)
Supplement: ao0c00772_si_001.pdf [file ao0c00772_si_001.pdf]

## Supporting Information

### An investigation into SARS-CoV-2 resistance of compounds in garlic essential oil

Bui Thi Phuong Thuy<sup>1</sup>, Tran Thi Ai My<sup>2</sup>, Nguyen Thi Thanh Hai<sup>2</sup>, Le Trung Hieu<sup>2</sup>, Tran Thai Hoa<sup>2</sup>, Huynh Thi Phuong Loan<sup>2</sup>, Nguyen Thanh Triet<sup>3</sup>, Tran Thi Van Anh<sup>4</sup>, Phan Tu Quy<sup>5</sup>, Pham Van Tat<sup>6</sup>, Nguyen Van Hue<sup>7</sup>, Duong Tuan Quang<sup>8,\*</sup>, Nguyen Tien Trung<sup>9</sup>, Vo Thanh Tung<sup>10</sup>, Lam K. Huynh<sup>11,12</sup>, Nguyen Thi Ai Nhung<sup>2,\*</sup>

<sup>1</sup>*Faculty of Fundamental Science, Van Lang University, 45 Nguyen Khac Nhu Street, Ho Chi Minh City 700000, Viet Nam*

<sup>2</sup>*Department of Chemistry, University of Sciences, Hue University, 77 Nguyen Hue Street, Hue City, 530000, Vietnam*

<sup>3</sup>*Faculty of Traditional Medicine, University of Medicine and Pharmacy at Ho Chi Minh City, 217 Hong Bang Street, Ho Chi Minh City, 700000, Vietnam*

<sup>4</sup>*Faculty of Pharmacy, University of Medicine and Pharmacy at Ho Chi Minh City, 217 Hong Bang Street, Ho Chi Minh City, 700000, Vietnam*

<sup>5</sup>*Department of Natural Sciences & Technology, Tay Nguyen University, 567 Lê Duan Street, Buon Ma Thuot City, 630000, Vietnam*

<sup>6</sup>*Department of Environmental Engineering, Hoa Sen University, 93 Cao Thang Street, Ho Chi Minh City, 700000, Vietnam*

<sup>7</sup>*Faculty of Engineering and Technology, University of Agriculture and Forestry, Hue University, 102 Phung Hung Street, Hue City, 530000, Vietnam*

<sup>8</sup>*Department of Chemistry, University of Education, Hue University, 34 Le loi, Hue City, 530000, Vietnam*

<sup>9</sup>*Laboratory of Computational Chemistry and Modeling, Department of Chemistry, 170 An Duong Vuong Street, Quy Nhon University, Quy Nhon City, 590000, Vietnam*

<sup>10</sup>*University of Sciences, Hue University, 77 Nguyen Hue Street, Hue City, 530000, Vietnam*

<sup>11</sup>*Department of Chemical Engineering, International University, Quarter 6, Linh Trung Ward, Thu Duc District, Ho Chi Minh City, 700000 Vietnam*

<sup>12</sup>*Vietnam National University, Quarter 6, Linh Trung Ward, Thu Duc District, Ho Chi Minh City, 700000 Vietnam*

\*Correspondence to Nguyen Thi Ai Nhung (E-mail: [ntanhung@hueuni.edu.vn](mailto:ntanhung@hueuni.edu.vn)) and Duong Tuan Quang (E-mail: [dtquang@hueuni.edu.vn](mailto:dtquang@hueuni.edu.vn))

---

| No. | Table of Contents                                                                                                                                                                                                                                                                                                                                                                                                                                                                                                                                                                                   | Page |
|-----|-----------------------------------------------------------------------------------------------------------------------------------------------------------------------------------------------------------------------------------------------------------------------------------------------------------------------------------------------------------------------------------------------------------------------------------------------------------------------------------------------------------------------------------------------------------------------------------------------------|------|
| 1   | <p><b>Figure S1.</b> Docking simulation with the interaction between compounds <b>T3, T6 – T10, T12 – T17</b> and the Angiotensin-Converting Enzyme 2 (ACE2) protein in human body: (A) T3-ACE2; (B) T6-ACE2; (C) T7-ACE2; (D) T8-ACE2; (E) T9-ACE2; (F) T10-ACE2; (G) T12-ACE2; (H) T13-ACE2; (I) T14-ACE2; (J) T15-ACE2; (K) T16-ACE2; (L) T17-ACE2. The inhibitory effects of compounds on the ACE2 protein: <b>T8 &gt; T9 &gt; T12 &gt; T13 &gt; T14 &gt; T15 &gt; T3 &gt; T7 &gt; T10 &gt; T16 &gt; T17 &gt; T6.</b></p>                                                                       | S-3  |
| 2   | <p><b>Figure S2.</b> Docking simulation with the interaction between compounds <b>T3, T6 – T10, T12 – T17</b> and the PDB6LU7 protein of the SARS-CoV-2: (A) T3-SARS-CoV-2; (B) T6- SARS-CoV-2; (C) T7- SARS-CoV-2; (D) T8- SARS-CoV-2; (E) T9-SARS-CoV-2; (F) T10- SARS-CoV-2; (G) T12-SARS-CoV-2; (H) T13-SARS-CoV-2; (I) T14-SARS-CoV-2; (J) T15-SARS-CoV-2; (K) T16-SARS-CoV-2; (L) T17-SARS-CoV-2. The inhibitory effects of compounds on the PDB6LU7 protein of the SARS-CoV-2: <b>T15 &gt; T8 &gt; T16 &gt; T9 &gt; T12 &gt; T13 &gt; T3 &gt; T6 &gt; T7 &gt; T10 &gt; T14 &gt; T17.</b></p> | S-4  |

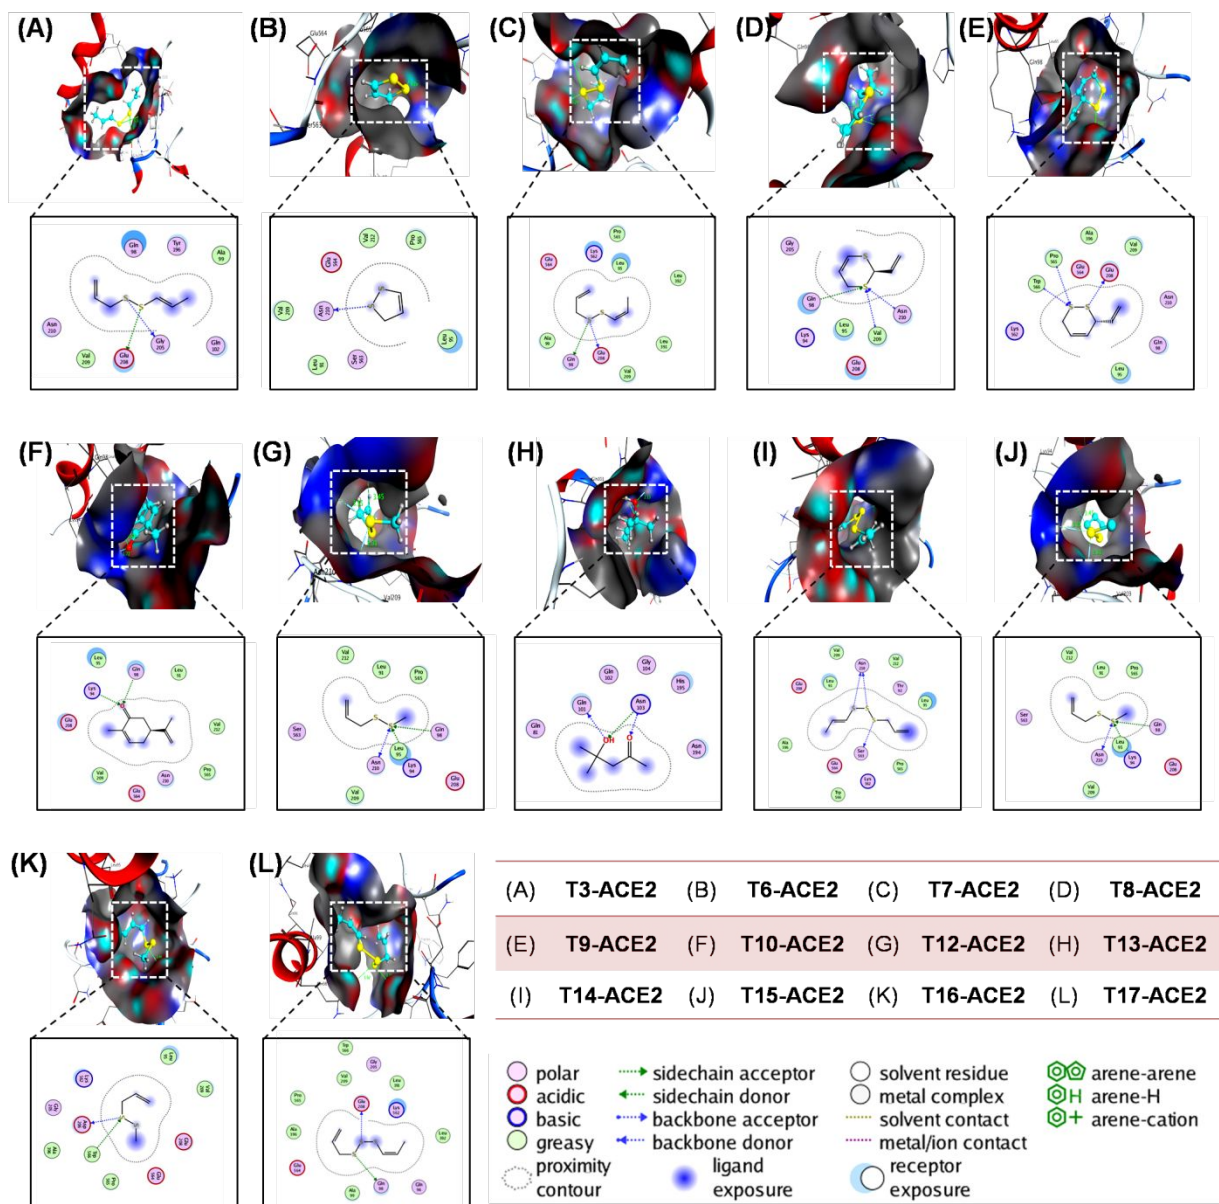

**Figure S1.** Docking simulation with the interaction between compounds **T3**, **T6** – **T10**, **T12** – **T17** and the Angiotensin-Converting Enzyme 2 (ACE2) protein in human body: (A) T3-ACE2; (B) T6-ACE2; (C) T7-ACE2; (D) T8-ACE2; (E) T9-ACE2; (F) T10-ACE2; (G) T12-ACE2; (H) T13-ACE2; (I) T14-ACE2; (J) T15-ACE2; (K) T16-ACE2; (L) T17-ACE2. The inhibitory effects of compounds on the ACE2 protein: **T8** > **T9** > **T12** > **T13** > **T14** > **T15** > **T3** > **T7** > **T10** > **T16** > **T17** > **T6**.

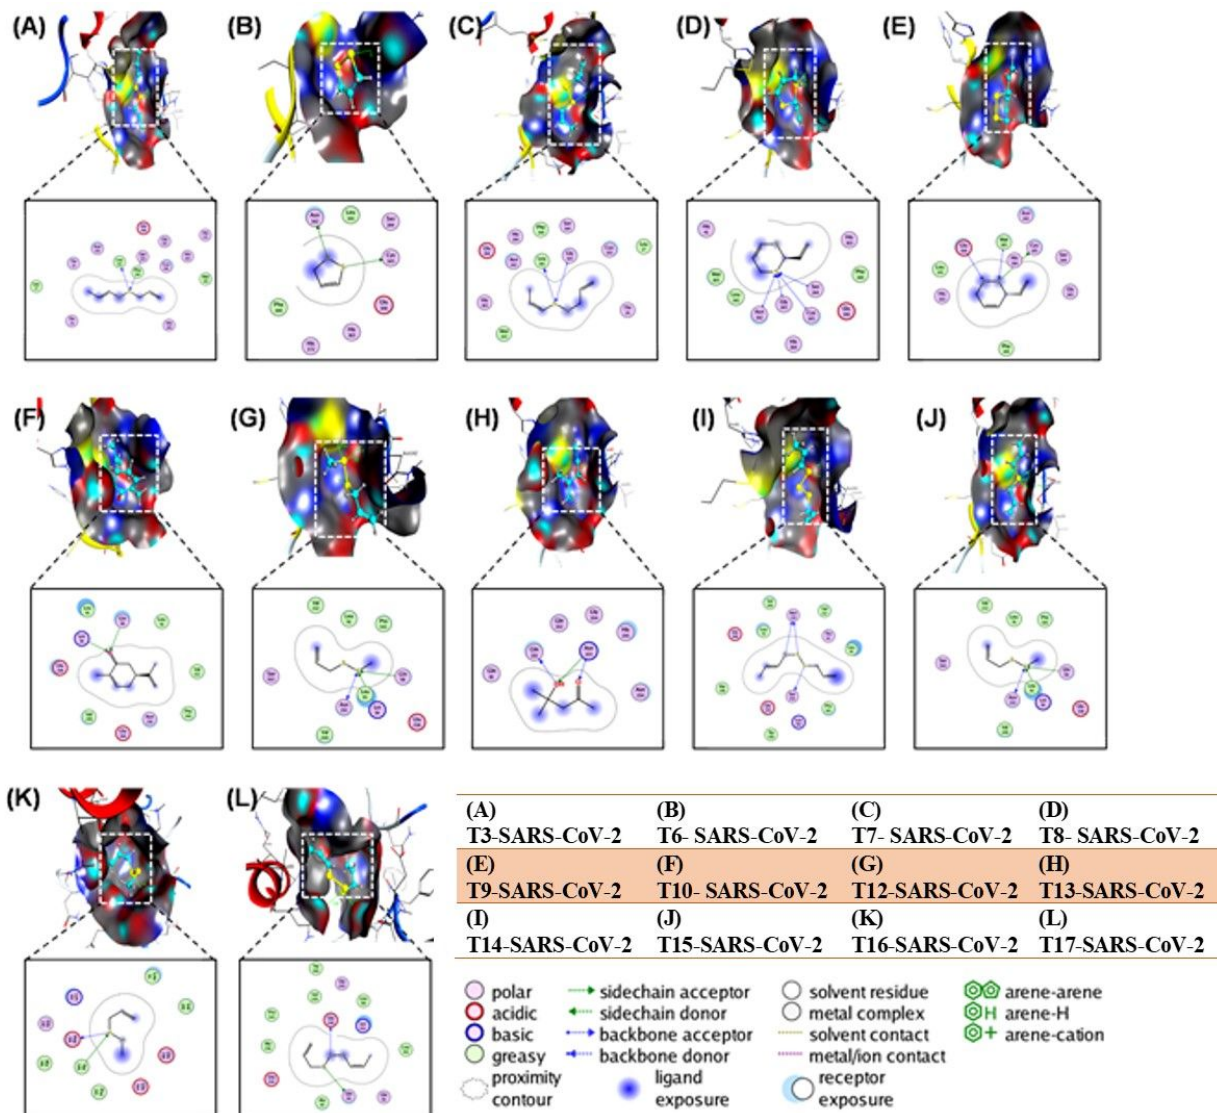

**Figure S2.** Docking simulation with the interaction between compounds **T3**, **T6** – **T10**, **T12** – **T17** and the PDB6LU7 protein of the SARS-CoV-2: (A) T3-SARS-CoV-2; (B) T6- SARS-CoV-2; (C) T7- SARS-CoV-2; (D) T8- SARS-CoV-2; (E) T9-SARS-CoV-2; (F) T10- SARS-CoV-2; (G) T12-SARS-CoV-2; (H) T13-SARS-CoV-2; (I) T14-SARS-CoV-2; (J) T15-SARS-CoV-2; (K) T16-SARS-CoV-2; (L) T17-SARS-CoV-2. The inhibitory effects of compounds on the PDB6LU7 protein of the SARS-CoV-2: **T15** > **T8** > **T16** > **T9** > **T12** > **T13** > **T3** > **T6** > **T7** > **T10** > **T14** > **T17**.
